# Supplementary material for: Decreased Nuclear Ascorbate Accumulation Accompanied with Altered Genomic Methylation Pattern in Fibroblasts from Arterial Tortuosity Syndrome Patients
Source: Oxid Med Cell Longev. 2019 Jan 13;2019:8156592. doi: 10.1155/2019/8156592 (PMC6360052; doi:10.1155/2019/8156592)
Supplement: Supplementary Materials — Table S1: quantitative analyses of 5-mC and 5-hmC enrichment of specific regions of candidate genes. [file 8156592.f1.xlsx]

## Sheet: q-(h)MeDIP
Relative enrichment of MeDIP and hMeDIP bound fractions (compared to control dermis tissue’s values)
		ALDH1A1		PPARG		P3H1		P4HA1		PLOD1		P4HA2		PFKFB3
		q-MeDIP	q-hMeDIP	q-MeDIP	q-hMeDIP	q-MeDIP	q-hMeDIP	q-MeDIP	q-hMeDIP	q-MeDIP	q-hMeDIP	q-MeDIP	q-hMeDIP	q-MeDIP	q-hMeDIP
Control	mean	7.48088	0.325928	1.03991	0.553689	1.60995	0.217265	0.50226	0.236206	1.30985	0.139057	0.166939	0.0672506	1.31243	0.15344
	SD	5.85576	0.754081	0.361652	0.91773	1.32837	0.388164	0.260381	0.615996	0.506331	0.361702	0.0767609	0.134437	0.578462	0.159589
Control + AA	mean	9.96718	0.737155	0.605007	1.48781	1.99545	0.590224	0.632598	0.83092	1.13445	0.467716	0.394873	4.02422	1.98303	1.39205
	SD	11.2423	0.889012	0.176732	0.436996	1.4558	0.426316	0.456316	1.16771	0.622056	0.461245	0.436218	8.1138	2.04426	0.961334
Control wo AA vs with AA
	p-value of t-test	0.613234	0.369061	0.016	0.0316501	0.614187	0.51181	0.523975	0.25637	0.573584	0.163729	0.198357	0.221319	0.419967	0.00564442
Patient	mean	6.05821	0.803364	1.12907	0.051	4.04179	0.819965	0.334328	0.0739801	1.04584	0.227663	0.480713	0.128599	1.61201	0.506238
	SD	3.44575	0.98274	0.283812	0.088	4.61229	1.05701	0.23809	0.1389	0.660798	0.279586	0.782101	0.150683	1.53478	0.877337
Patient + AA	mean	5.30723	0.0944308	0.818543	0.0701062	3.33003	0.523757	0.673444	0.0878524	1.15859	0.327636	0.24799	0.615281	1.67744	1.42563
	SD	2.13591	0.128884	0.507763	0.0469521	2.46337	0.733565	0.5048	0.124031	0.796024	0.463241	0.282537	0.858936	0.619968	1.56395
Patient wo AA vs with AA
	p-value of t-test	0.723747	0.391821	0.344014	0.552659	0.794563	0.746192	0.269939	0.911488	0.834676	0.747808	0.595933	0.278779	0.939558	0.385347
Control vs Patient (wo AA)
	p-value of t-test	0.671499	0.386658	0.443405	0.773812	0.21018	0.732646	0.317498	0.623547	0.473117	0.684314	0.300657	0.502322	0.645414	0.309843
